# Supplementary material
Source: Springer Nature journal article supplement (https://www.springermedizin.de/resource/supplementary/12943_2009_618_MOESM11_ESM.pdf/9554420)
Supplement: MOESM11 [file 9554420]

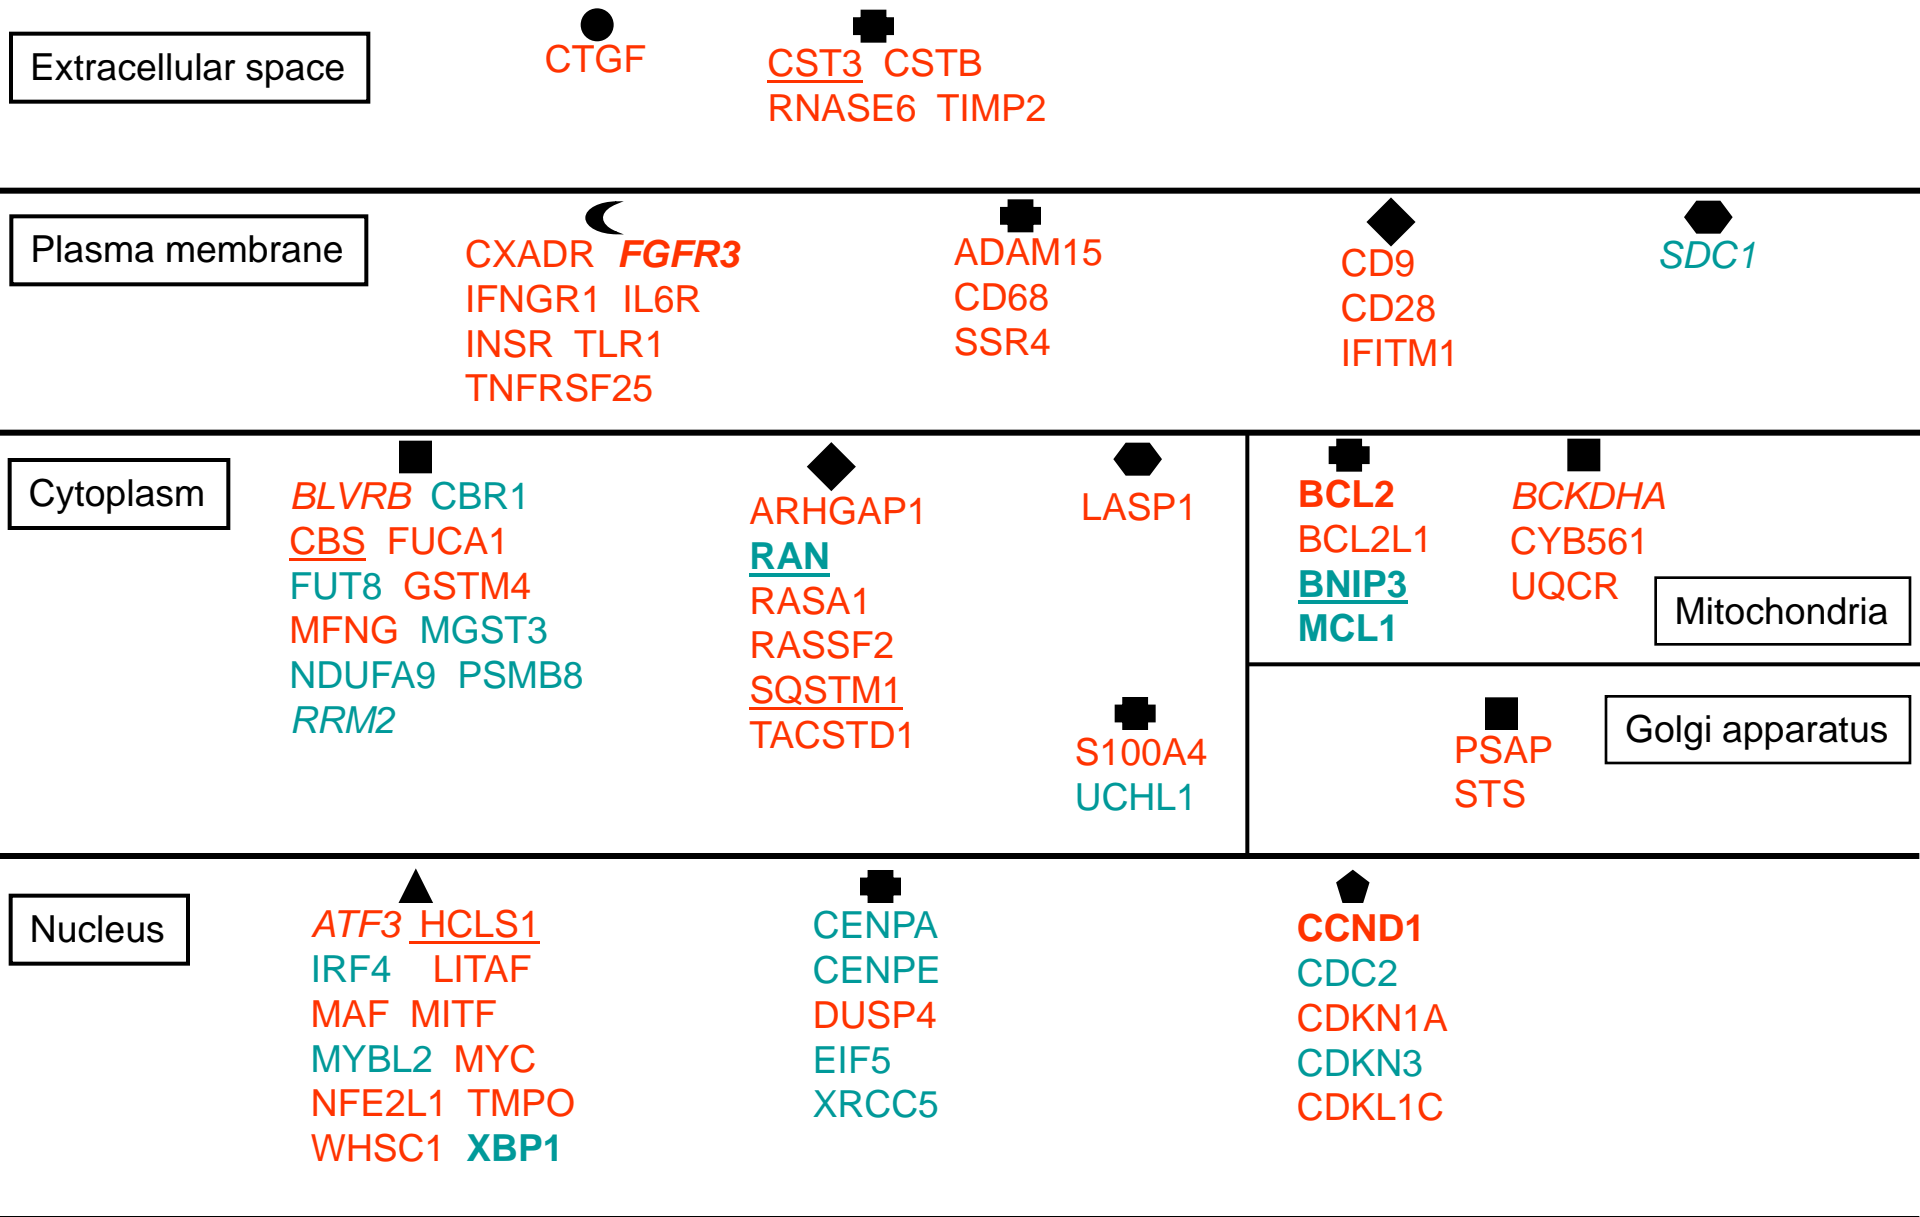

- Growth factor
- ▲ Transcription factor
- Metabolic enzyme
- ◆ Signal transduction
- Cytoskeleton organization
- Other
- ☾ Transmembrane receptor
- ◆ Cell cycle regulator
